# Supplementary material for: Aucubin improves glucolipid metabolic disorder in T2DM mice via the miR-505- 5p/IGF1/FIT1/IRS1/PI3K signaling pathway
Source: Research Square preprint supplement (doi:10.21203/rs.3.rs-8202756/v1), 2025-12-16
Supplement: Supplementary file 1 [file 006f633a7c5a04f696235257.docx]

Supplementary Material

**Table**

Table S1. Raw data and clean data of miRNA sequencing libraries

| Sample | Raw reads | Raw bases | Clean reads | Clean bases | Error rate(%) | Q30(%) | Useful reads(18nt-32nt) |
| --- | --- | --- | --- | --- | --- | --- | --- |
| NC1 | 10794017 | 809551275 | 9695089 | 233674641 | 0.0112 | 97.36 | 9109360 |
| NC2 | 10263221 | 769741575 | 8980286 | 221672671 | 0.0112 | 97.36 | 8264600 |
| NC3 | 10192071 | 764405325 | 9061089 | 222799435 | 0.0113 | 97.15 | 8259909 |
| MC1 | 10333694 | 775027050 | 8929087 | 206933828 | 0.0114 | 97.06 | 8602324 |
| MC2 | 12189804 | 914235300 | 10602154 | 243979427 | 0.0113 | 97.12 | 10275165 |
| MC3 | 11094191 | 832064325 | 9651021 | 220316220 | 0.0114 | 96.92 | 9462593 |
| AU1 | 12215837 | 916187775 | 11089012 | 249243889 | 0.0112 | 97.42 | 10993350 |
| AU2 | 10725457 | 804409275 | 9597875 | 216067120 | 0.0113 | 97.2 | 9498910 |
| AU3 | 11802183 | 885163725 | 9896326 | 223878862 | 0.0113 | 97.2 | 9726236 |

Note: NC, normal control group; MC, model control group; AU, aucubin group.

Table S2. Numbers of miRNA in different samples

| Sample | Known miRNAs | Novel miRNAs | Total |
| --- | --- | --- | --- |
| NC1 | 478 | 88 | 566 |
| NC2 | 484 | 88 | 572 |
| NC3 | 532 | 64 | 596 |
| MC1 | 590 | 39 | 629 |
| MC2 | 611 | 35 | 646 |
| MC3 | 632 | 39 | 671 |
| AU1 | 628 | 41 | 669 |
| AU2 | 599 | 39 | 638 |
| AU3 | 624 | 38 | 662 |

Note: NC, normal control group; MC, model control group; HAU, aucubin group.

Table S3. Raw data and clean data of mRNA sequencing libraries

| Sample | Raw reads | Raw bases | Clean reads | Clean bases | Error rate(%) | Q30(%) |
| --- | --- | --- | --- | --- | --- | --- |
| NC1 | 44910096 | 6781424496 | 44486978 | 6621761897 | 0.0119 | 96.35 |
| NC2 | 43612450 | 6585479950 | 43214204 | 6477955956 | 0.0119 | 96.26 |
| NC3 | 42556096 | 6425970496 | 42219290 | 6326030873 | 0.0118 | 96.47 |
| MC1 | 48780898 | 7365915598 | 48406596 | 7254776205 | 0.0118 | 96.38 |
| MC2 | 45934844 | 6936161444 | 45552148 | 6823115475 | 0.0119 | 96.3 |
| MC3 | 42830708 | 6467436908 | 42476904 | 6384813974 | 0.0119 | 96.25 |
| AU1 | 45630364 | 6890184964 | 45259136 | 6798197182 | 0.0119 | 96.23 |
| AU2 | 43135670 | 6513486170 | 42765562 | 6412692292 | 0.0118 | 96.44 |
| AU3 | 45785486 | 6913608386 | 45243354 | 6753467277 | 0.0117 | 96.63 |

Note: NC, normal control group; MC, model control group; AU, aucubin group.

Table S4. Alignment analysis of mRNA sequences

| Sample | Total reads | Total mapped | Multiple mapped | Unique mapped |
| --- | --- | --- | --- | --- |
| NC1 | 44486978 | 41074639(92.33%) | 5864422(13.18%) | 35210217(79.15%) |
| NC2 | 43214204 | 39993313(92.55%) | 6114045(14.15%) | 33879268(78.4%) |
| NC3 | 42219290 | 39554392(93.69%) | 5282110(12.51%) | 34272282(81.18%) |
| MC1 | 48406596 | 46719918(96.52%) | 5126932(10.59%) | 41592986(85.92%) |
| MC2 | 45552148 | 44250207(97.14%) | 4097101(8.99%) | 40153106(88.15%) |
| MC3 | 42476904 | 41020440(96.57%) | 5660428(13.33%) | 35360012(83.25%) |
| AU1 | 45259136 | 43634907(96.41%) | 4543792(10.04%) | 39091115(86.37%) |
| AU2 | 42765562 | 41535289(97.12%) | 4637452(10.84%) | 36897837(86.28%) |
| AU3 | 45243354 | 43760508(96.72%) | 4455692(9.85%) | 39304816(86.87%) |

Note: NC, normal control group; MC, model control group; AU, aucubin group.

**Figure**


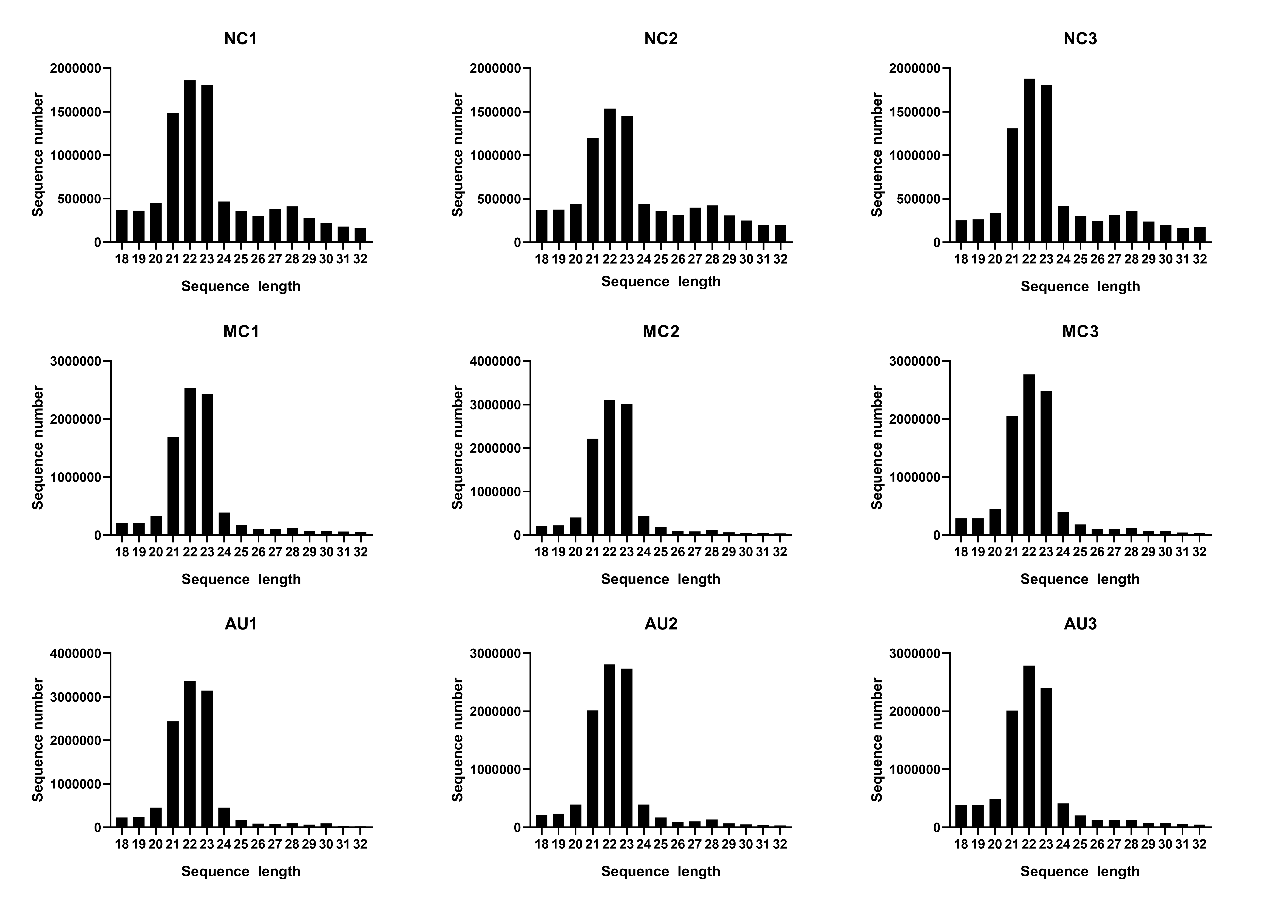


Figure S1. The length-frequency distribution of clean reads in each sample library. Note: NC, normal control group; MC, model control group; AU, aucubin group.
